# Supplementary material
Source: PubMed Central journal article supplement (PMC11563283)
Supplement: media-5.pdf [file media-5.pdf]

**A**

*P. dumerilii* RE families RNA-seq counts

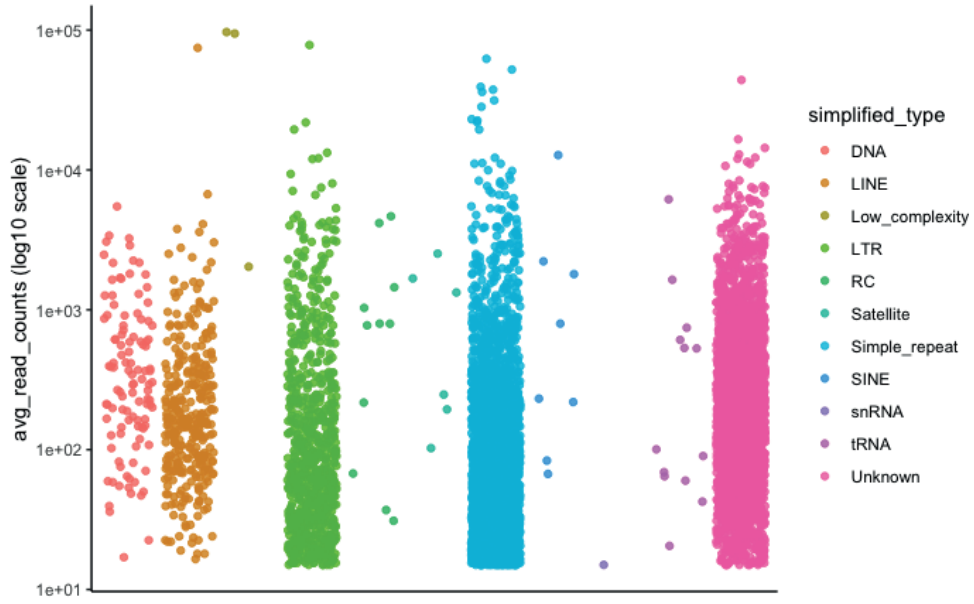

**B**

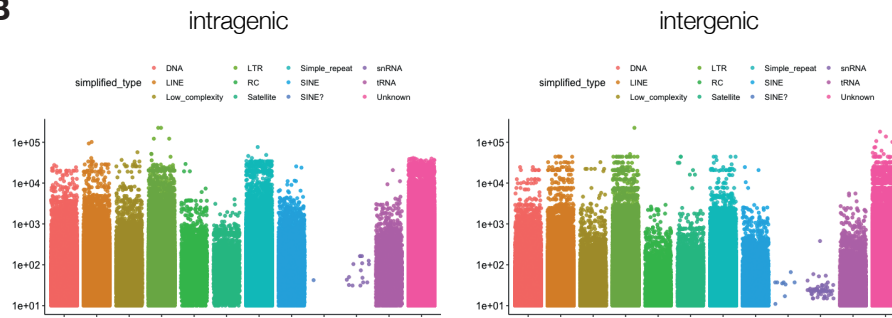

**C**

*P. dumerilii* RE types in distinct genomic regions

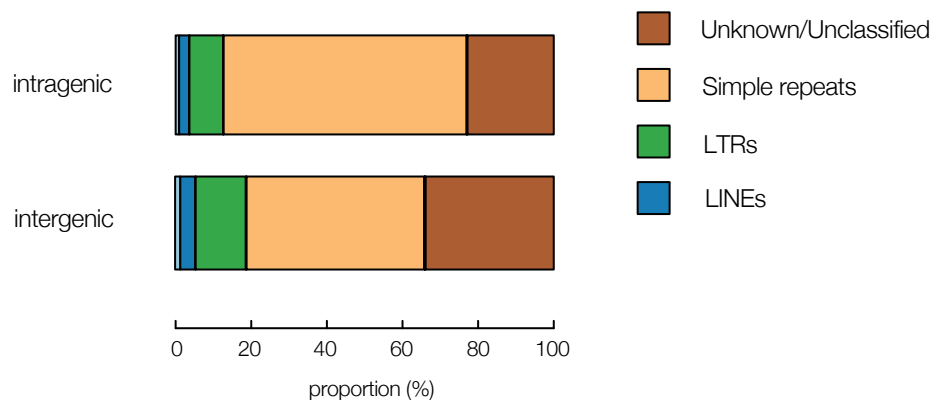

\*\*distinct RE families only, redundant family-type pairs filtered out
