# Supplementary material
Source: PubMed Central journal article supplement (PMC11563283)

**A****Repeat element size distributions in *P. dumerilii***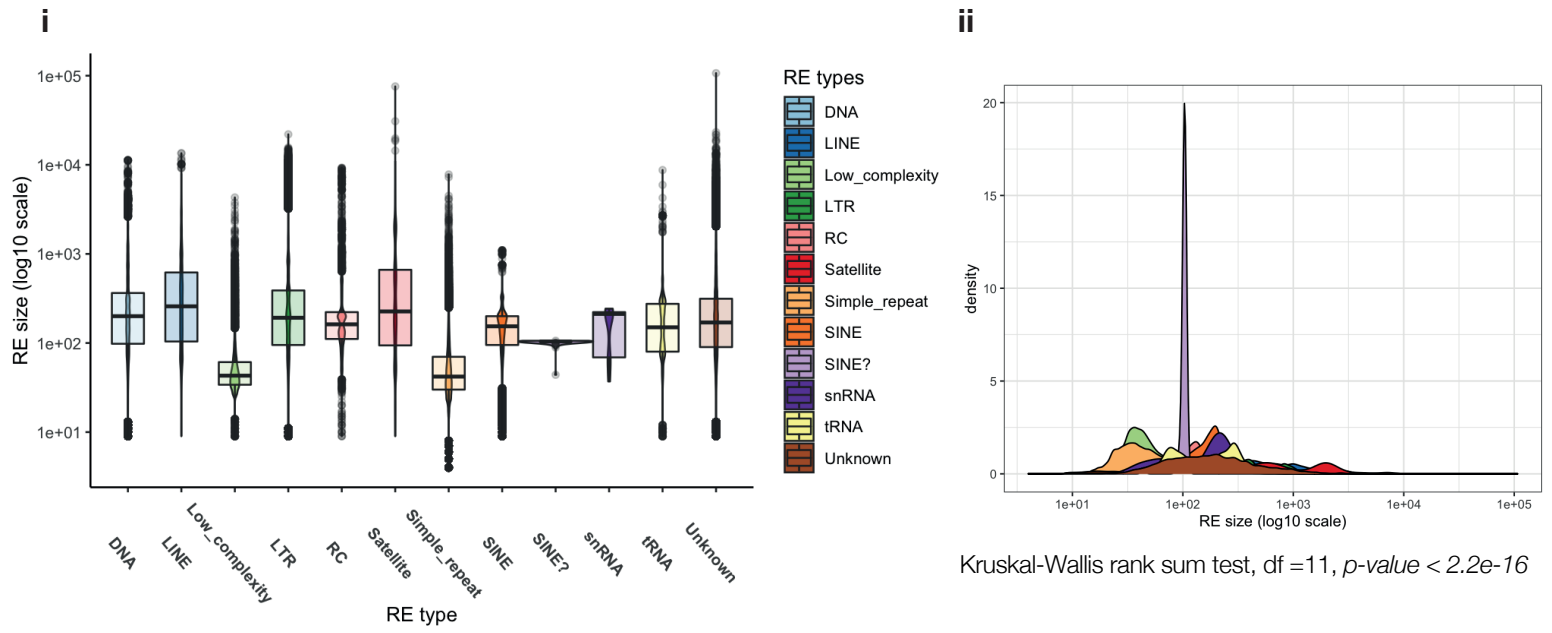**B****Repeat element size distributions in annelids**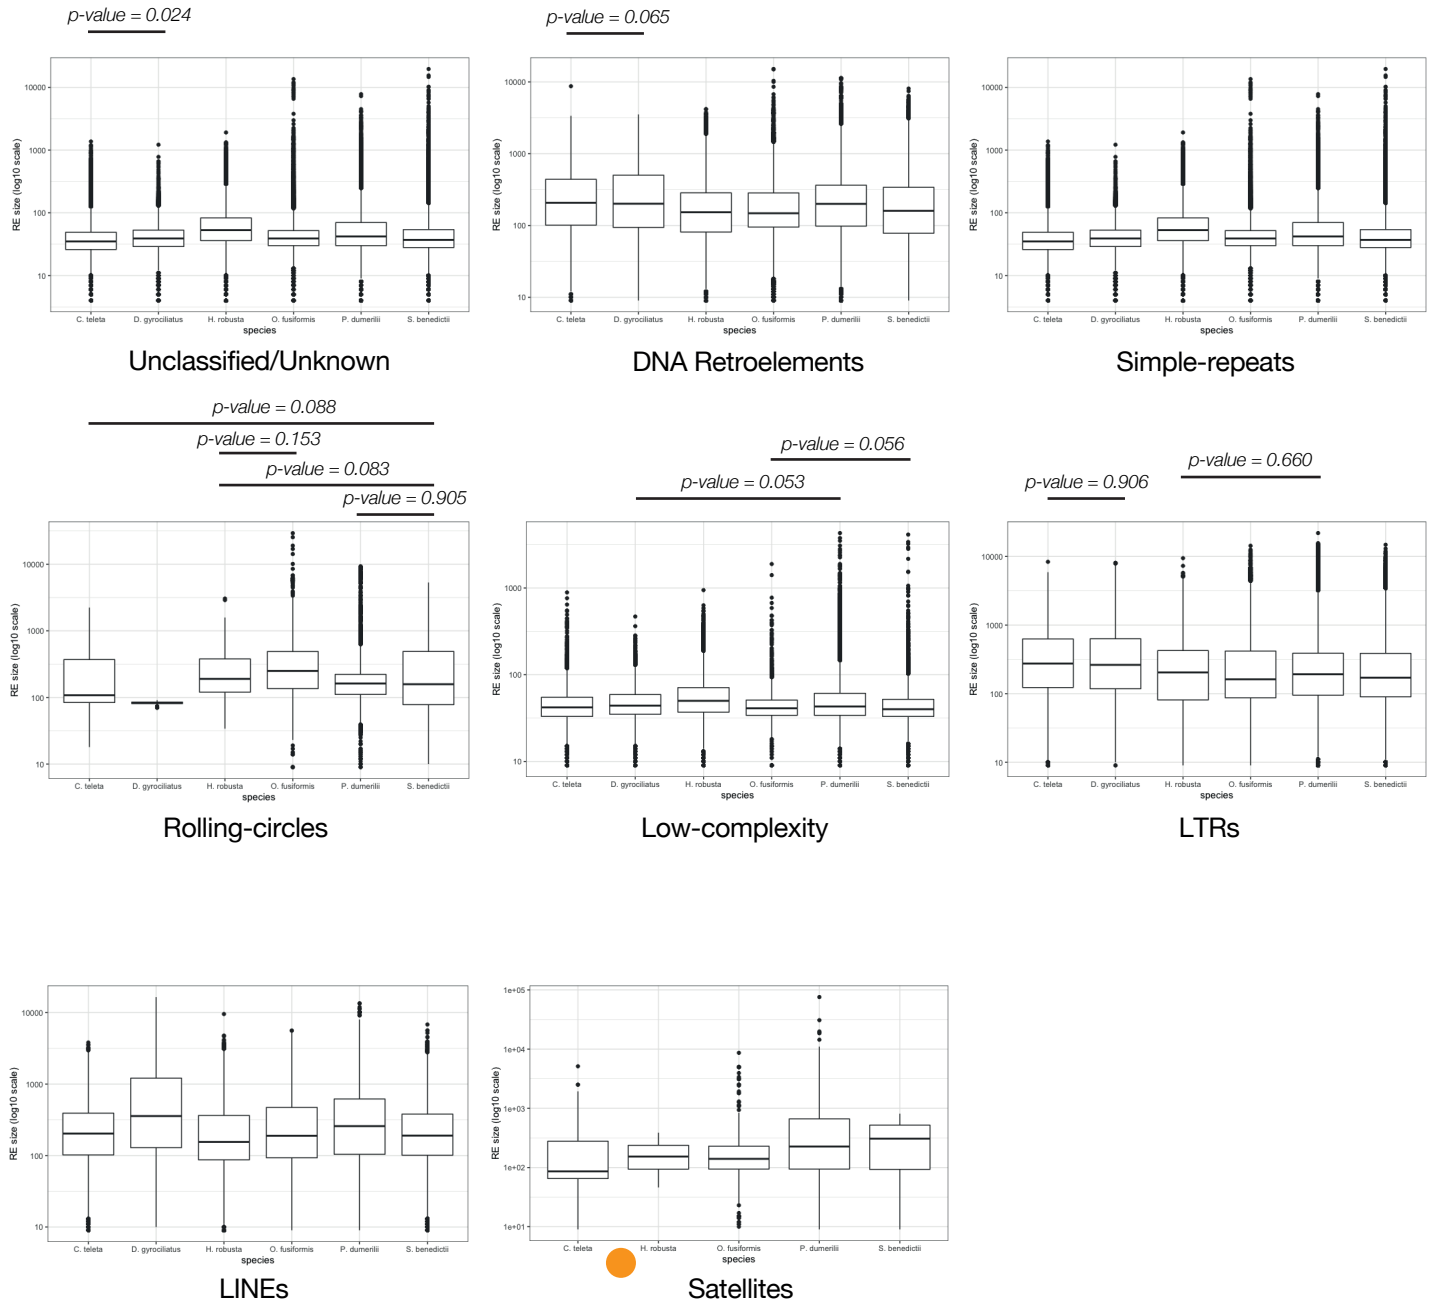

Supplement: media-6.pdf [file media-6.pdf]
