# Supplementary material
Source: PubMed Central journal article supplement (PMC11563283)

**A**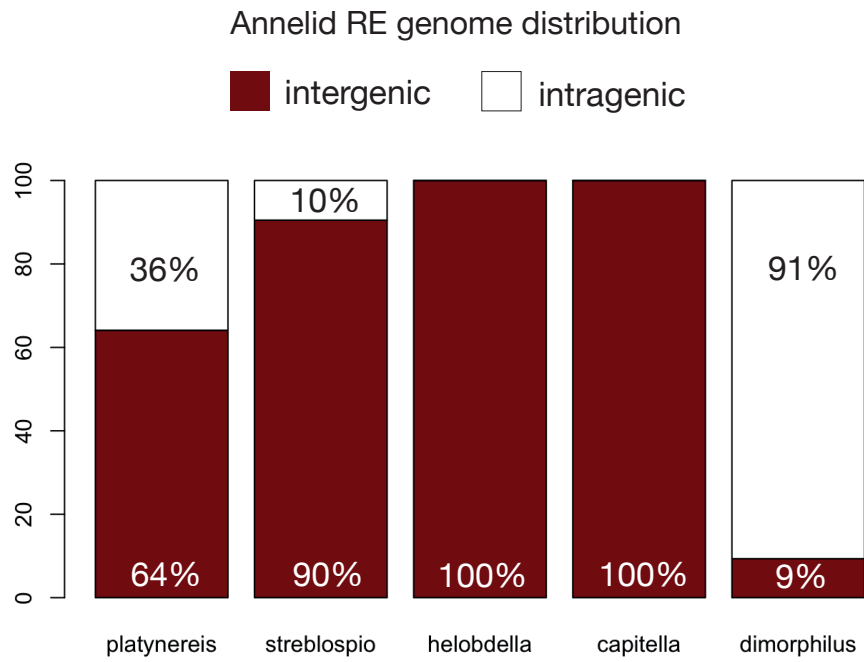**B**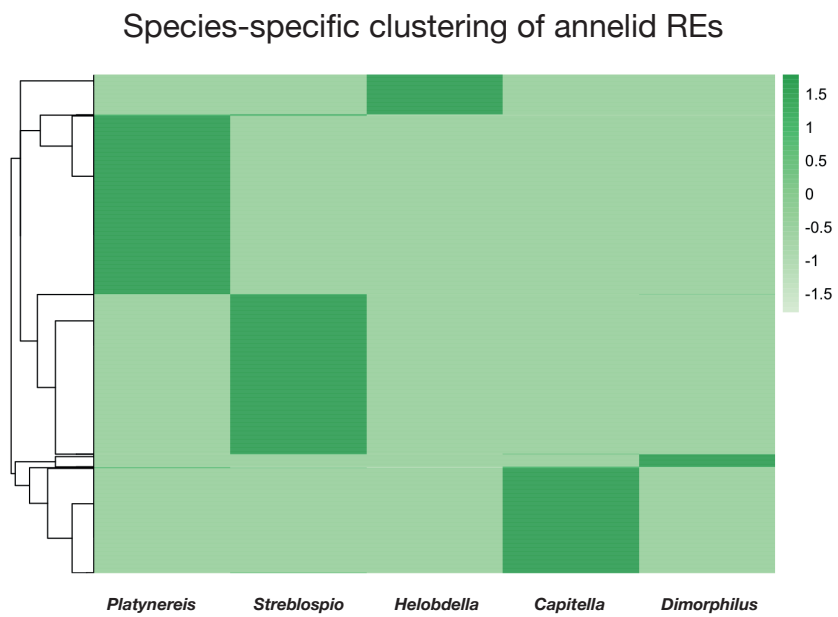

Supplement: media-7.pdf [file media-7.pdf]
