# Supplementary material
Source: PubMed Central journal article supplement (PMC11563283)
Supplement: media-8.pdf [file media-8.pdf]

*P. dumerilii* self-self alignment map

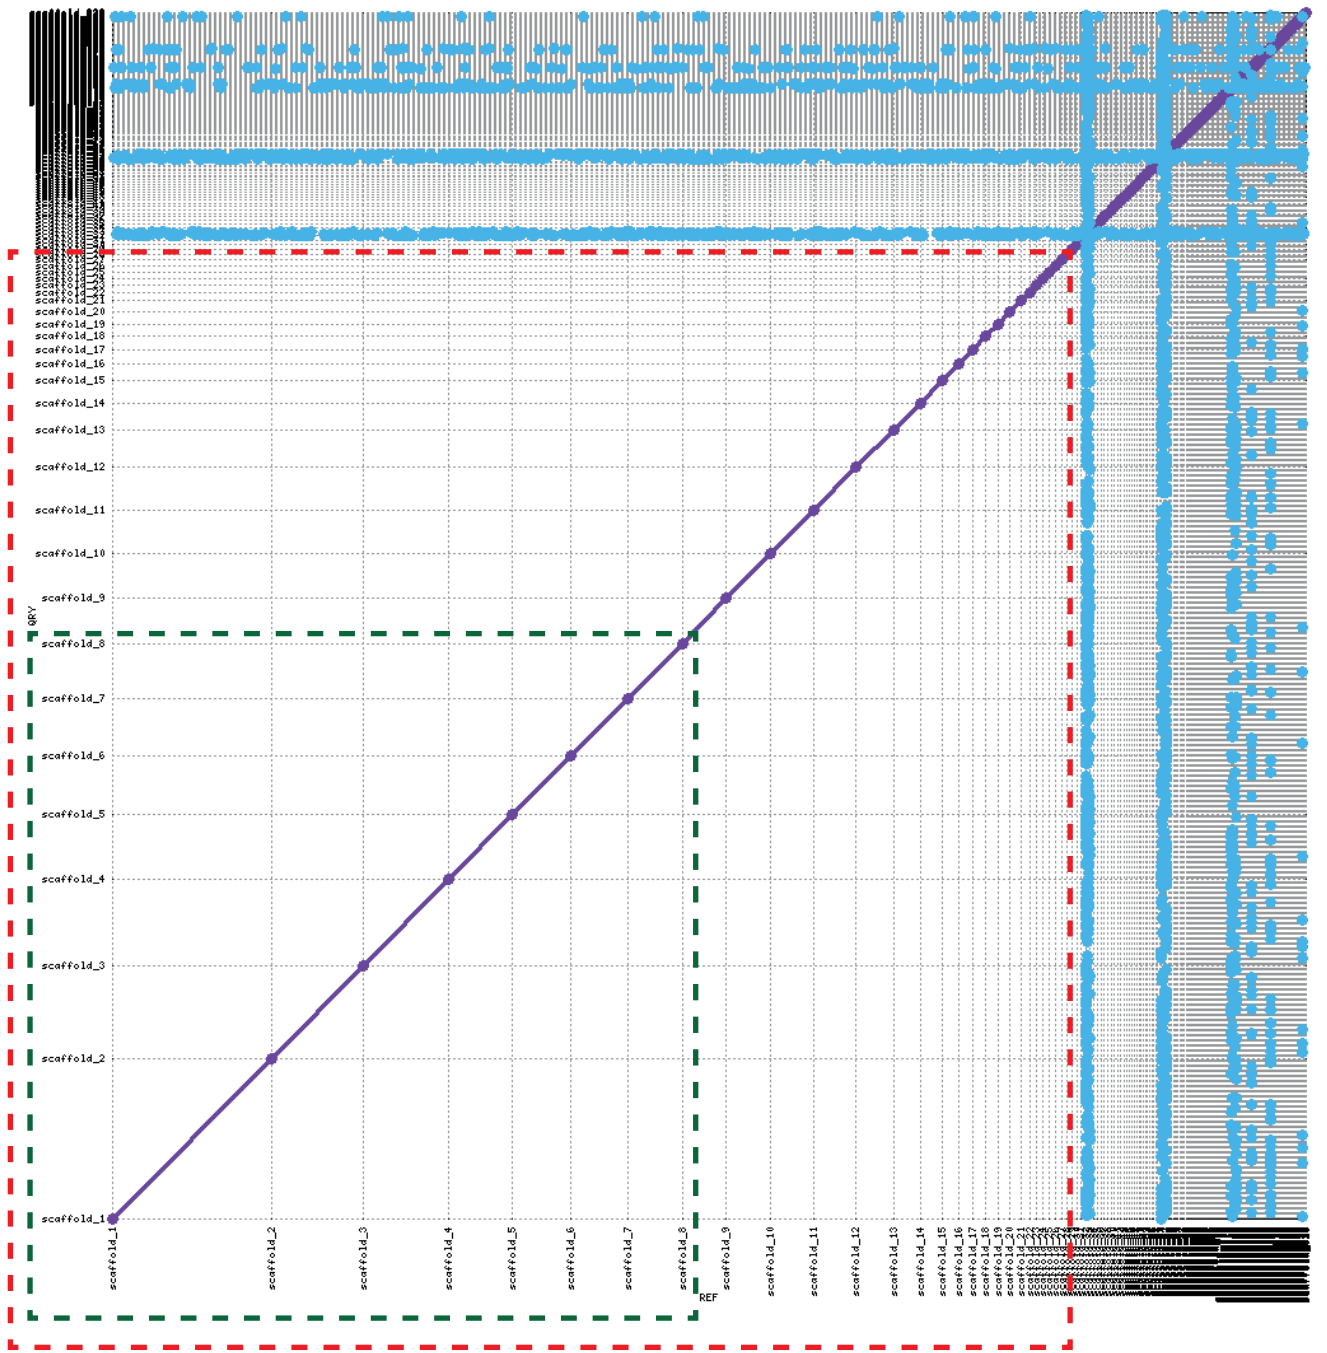

- 50% of assembly in 8 scaffolds
- 80% of assembly in 28 scaffolds

● Probable repeat elements/centromeric and/or telomeric genomic sequences
