# Supplementary material
Source: PubMed Central journal article supplement (PMC11563283)

A

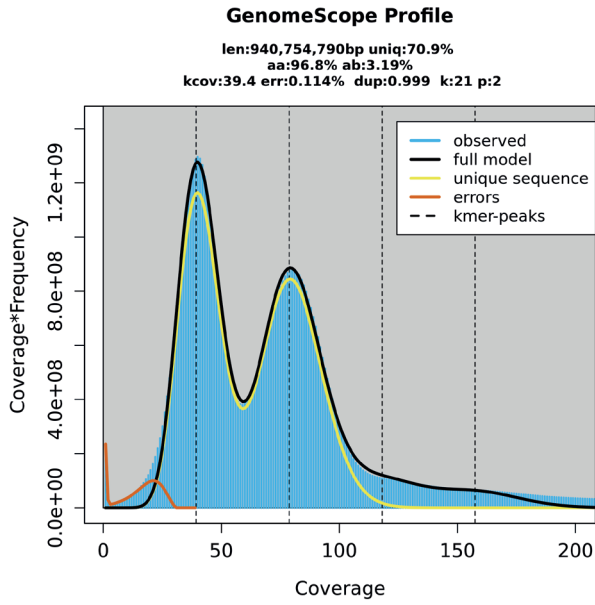

transformed\_linear\_plot

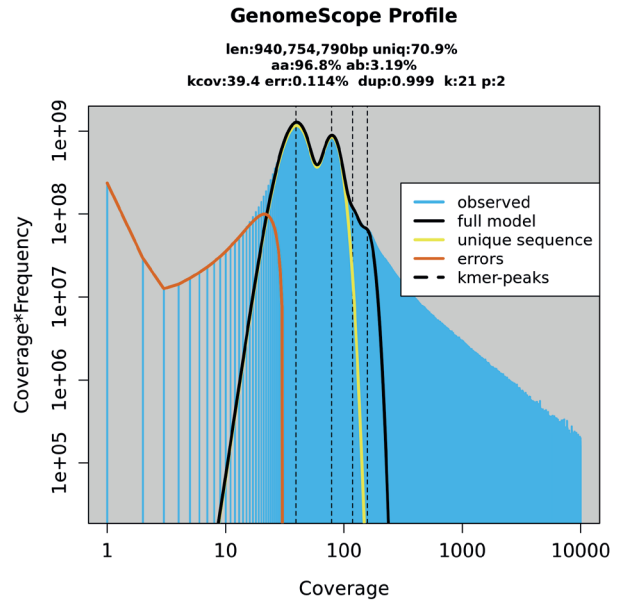

transformed\_log\_plot

B

Smudgeplot profiles

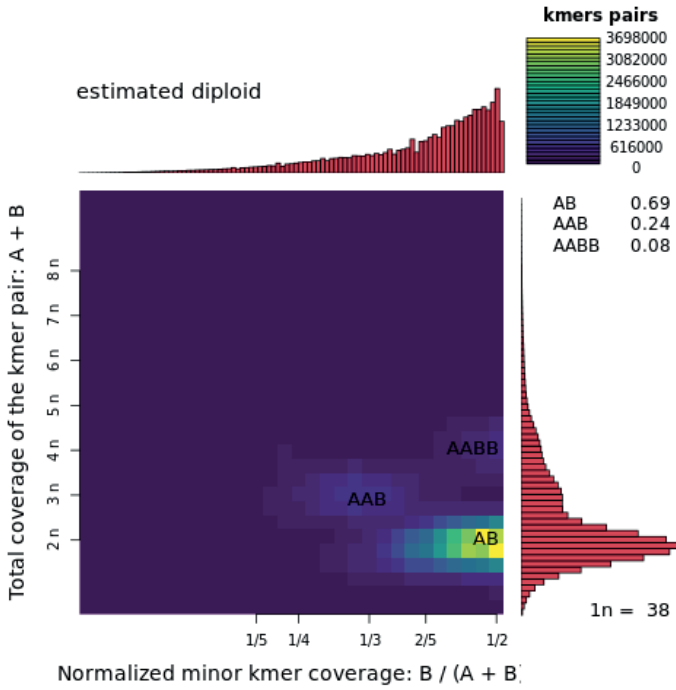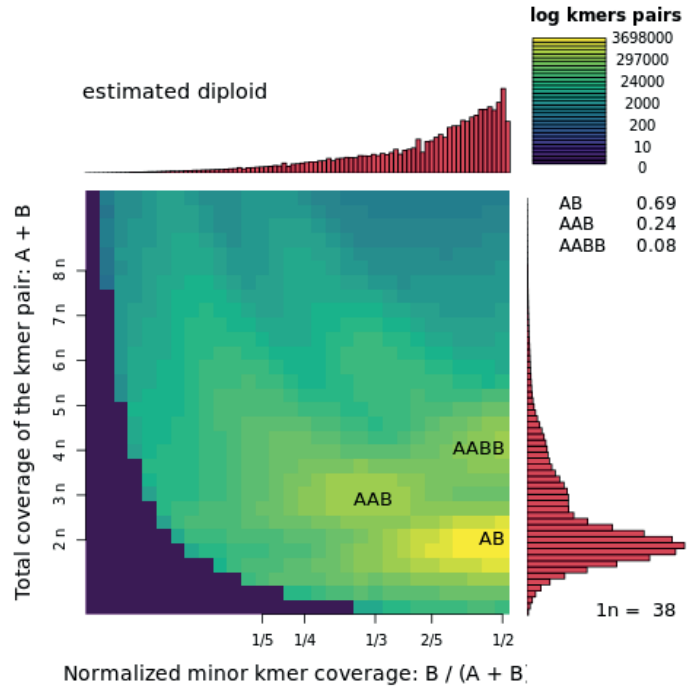

Supplement: media-9.pdf [file media-9.pdf]
