# Supplementary material
Source: PubMed Central journal article supplement (PMC11563283)

**A**

### High molecular weight gDNA quality check

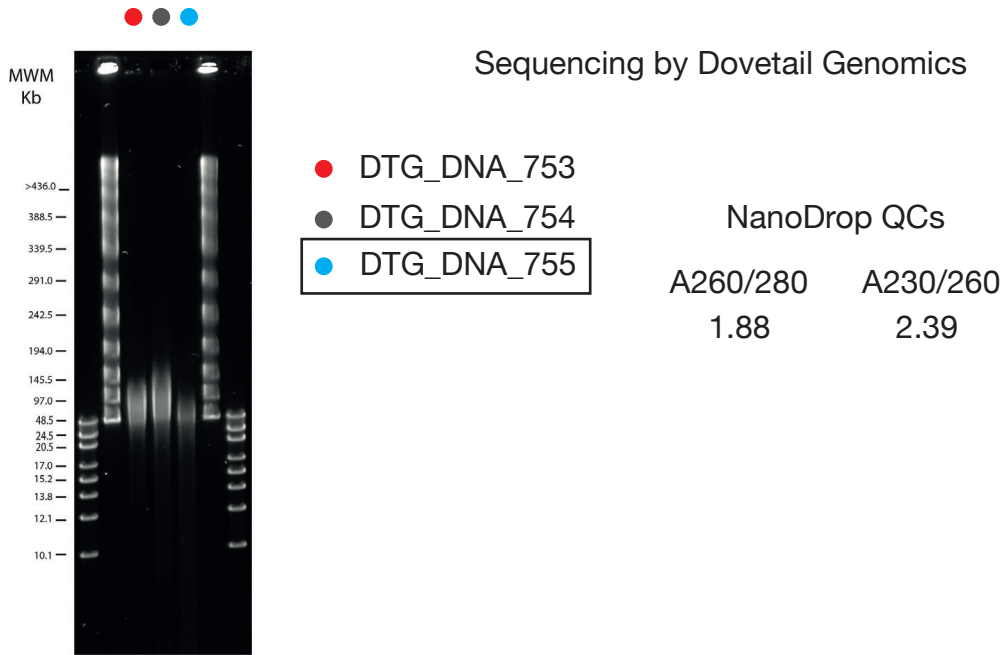

**B**

### PacBio Sequel I CLR reads distribution (> 200 GB data)

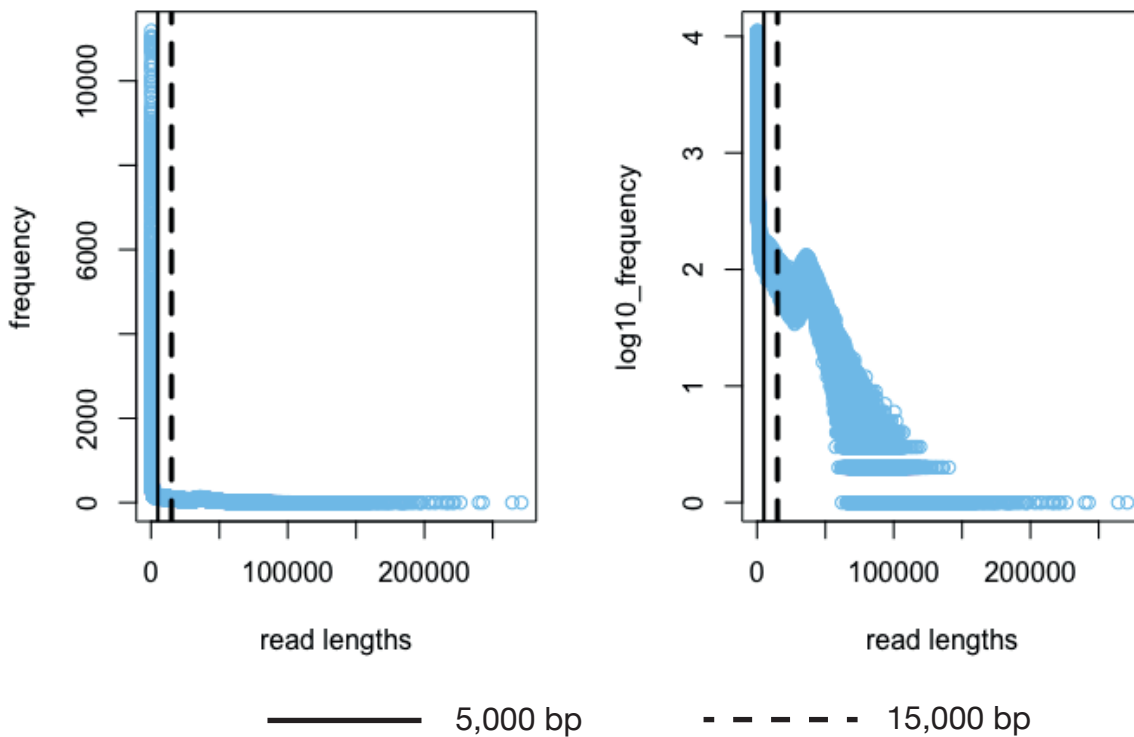

Supplement: media-10.pdf [file media-10.pdf]
