# Supplementary material
Source: PubMed Central journal article supplement (PMC11563283)
Supplement: media-11.pdf [file media-11.pdf]

# General sequencing, assembly and annotation pipeline

## Sequencing

PacBio Sequel II CLR  
Long-read-seq

> 200 Gb raw-data

## Assembly

CANU assembly #

## Removal of duplicates/haplotypes

- (i) purge\_dups\*\*4\_iter  
    purge\_haplotigs\*\*2\_iter
- (ii) repeat purge\_dups + purge\_haplotigs  
    iteratively\*\*4\_iter

}]  
BUSCO completion assessment  
at each step (>95% completion)

## Scaffolding

- (i) LINKS
- (ii) Hi-C Arima pipeline + SALSA2

## Illumina polishing

2X 150bp paired-end sequencing

## Genome annotation

- (i) Mapping total RNA-seq data
- (ii) Repetitive element annotation/masking
- (iii) tRNA + miRNA annotation
- (iv) StringTie genome annotation
- (v) Variant calling

# Three different assemblers were tried and tested prior to settling on the CANU algorithm
