# Supplementary material
Source: PubMed Central journal article supplement (PMC11563283)

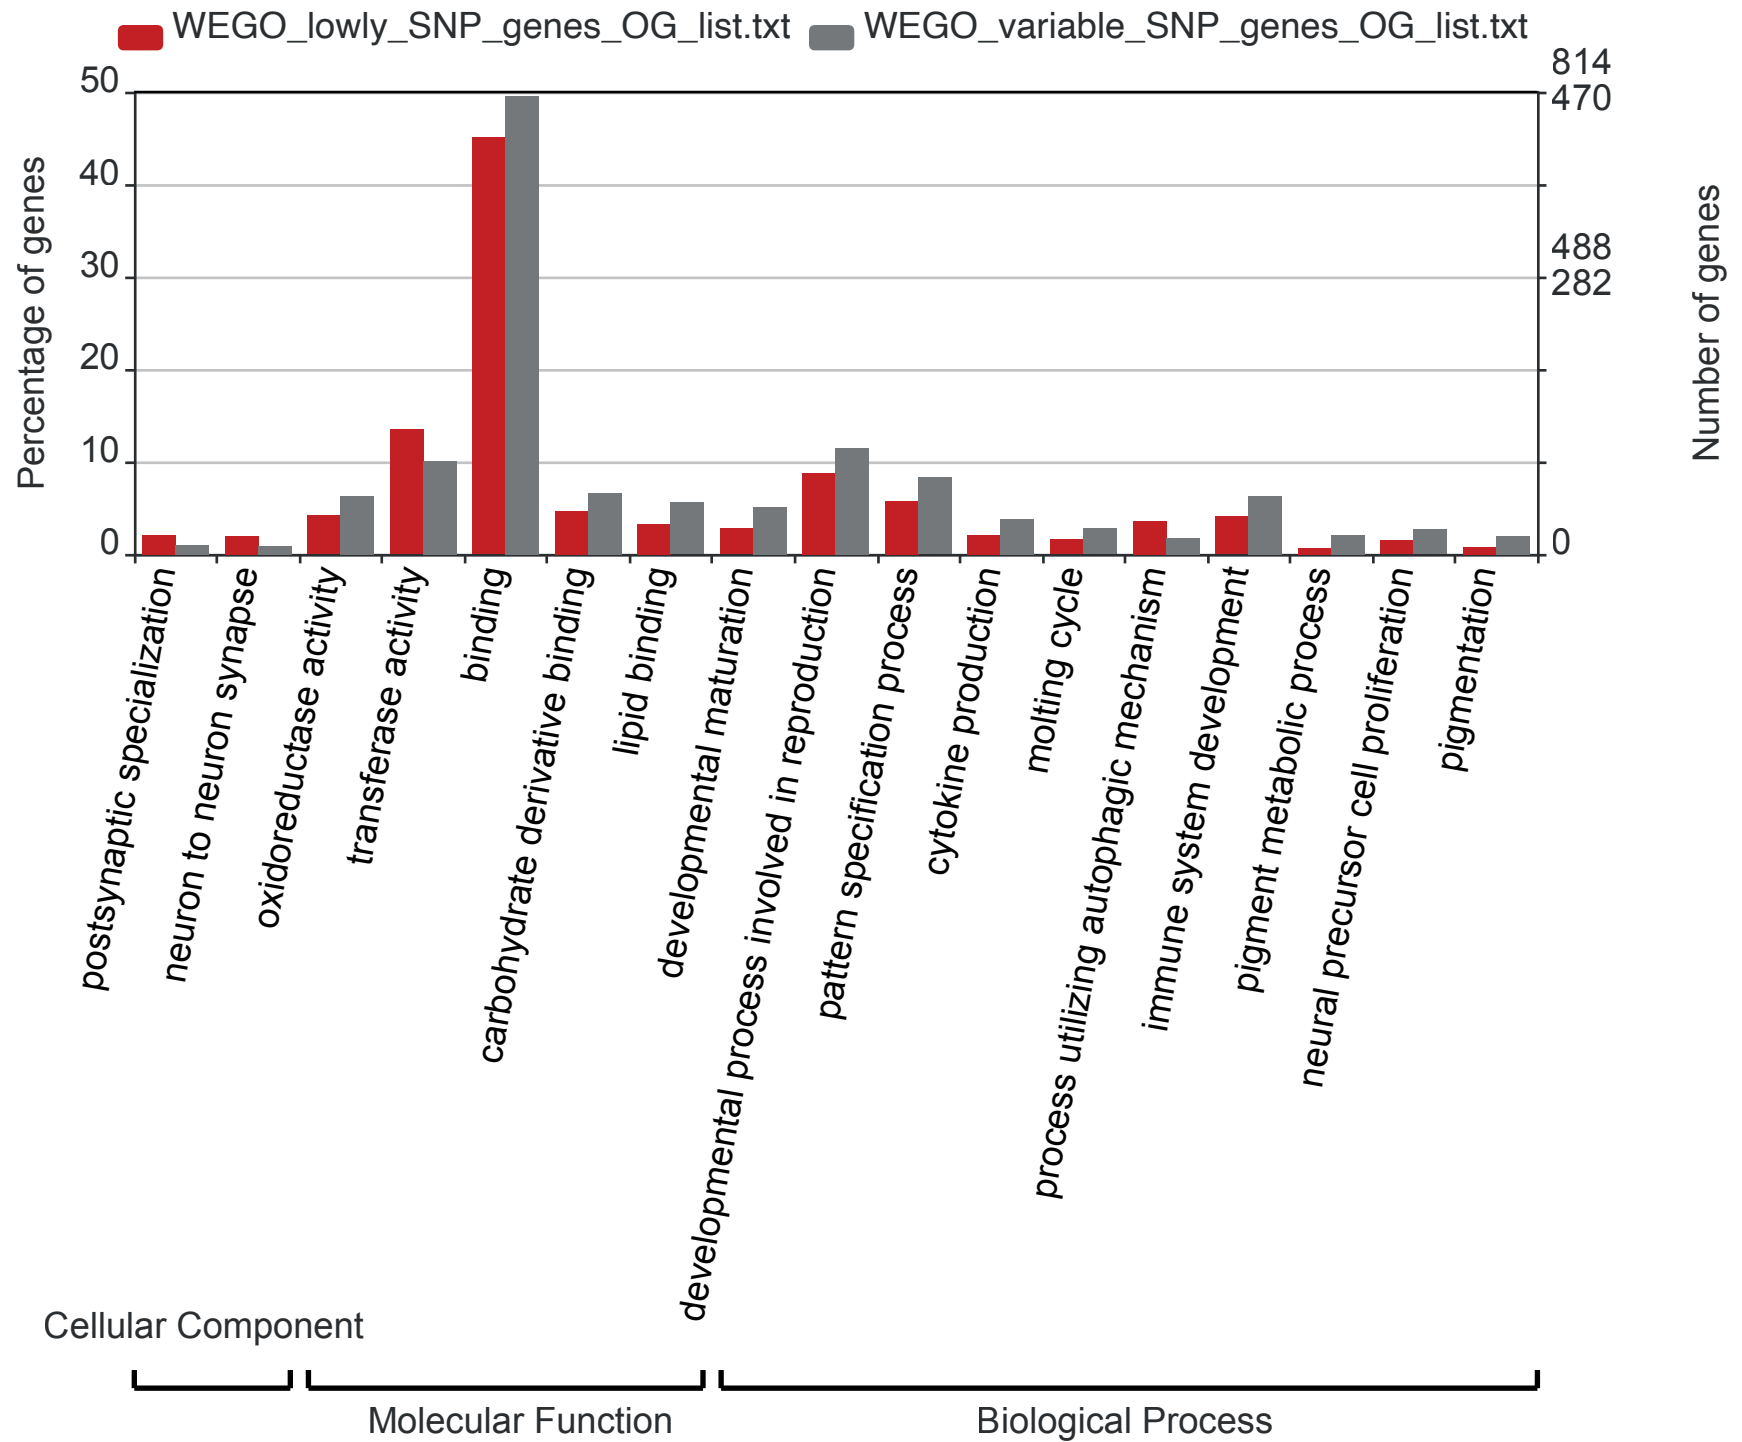

Supplement: media-12.pdf [file media-12.pdf]
