# Supplementary material
Source: PubMed Central journal article supplement (PMC11563283)

*P. dumerilii* XLOC\_000415  
scaffold\_1

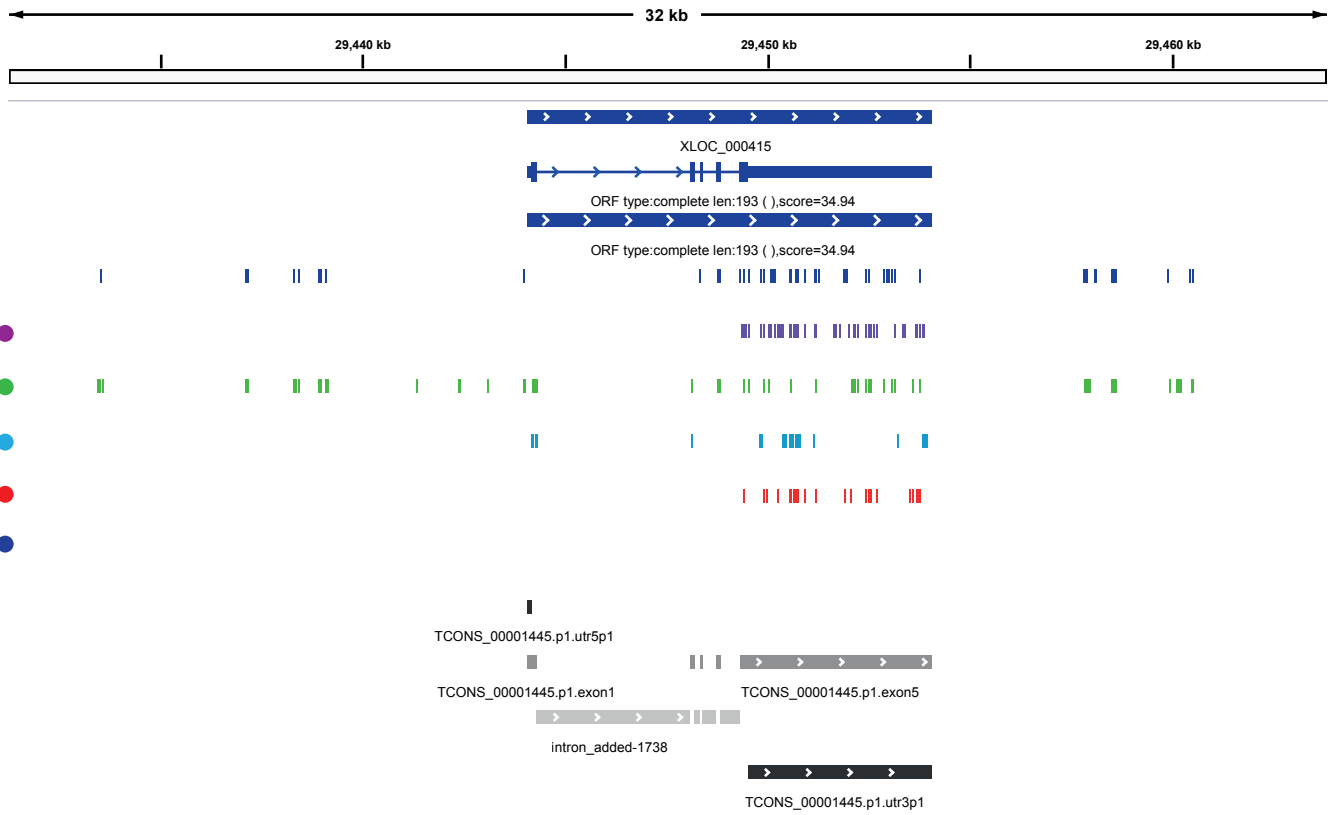

Supplement: media-13.pdf [file media-13.pdf]
