# Supplementary material
Source: PubMed Central journal article supplement (PMC11563283)

# SNP/InDel gene feature abundance

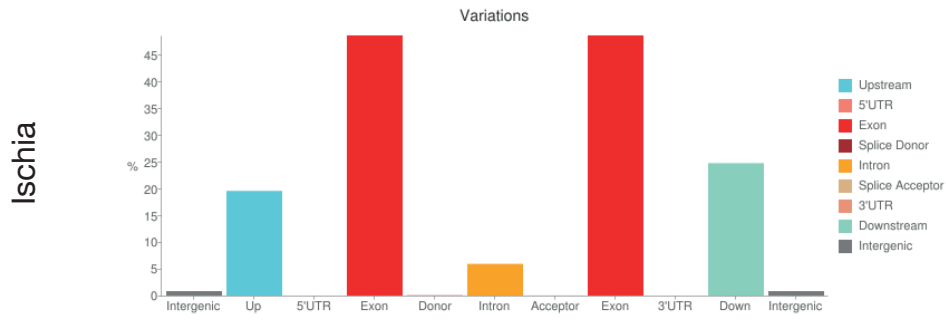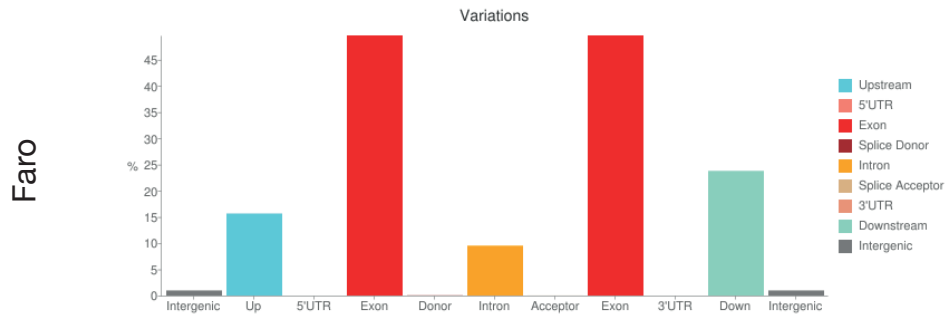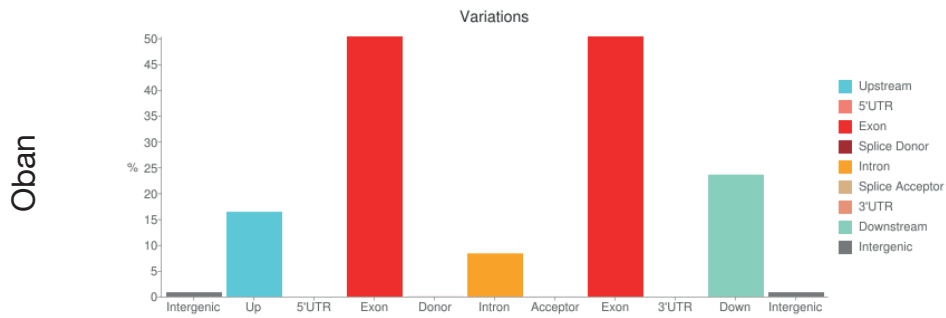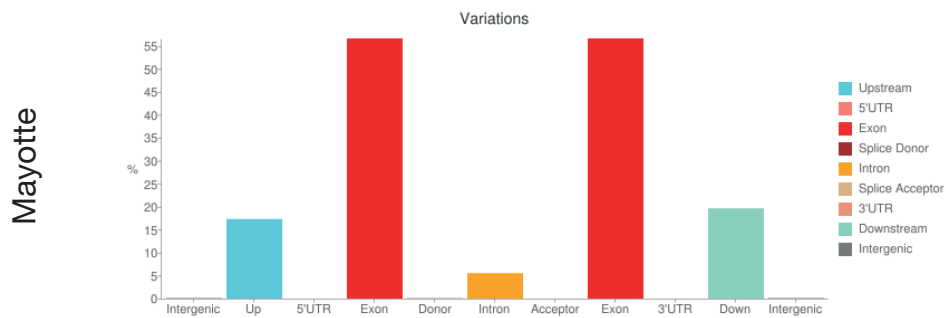

Supplement: media-14.pdf [file media-14.pdf]
