# Supplementary material
Source: PubMed Central journal article supplement (PMC11563283)
Supplement: media-15.pdf [file media-15.pdf]

# SNPs + In/Del(s) count per gene correlation

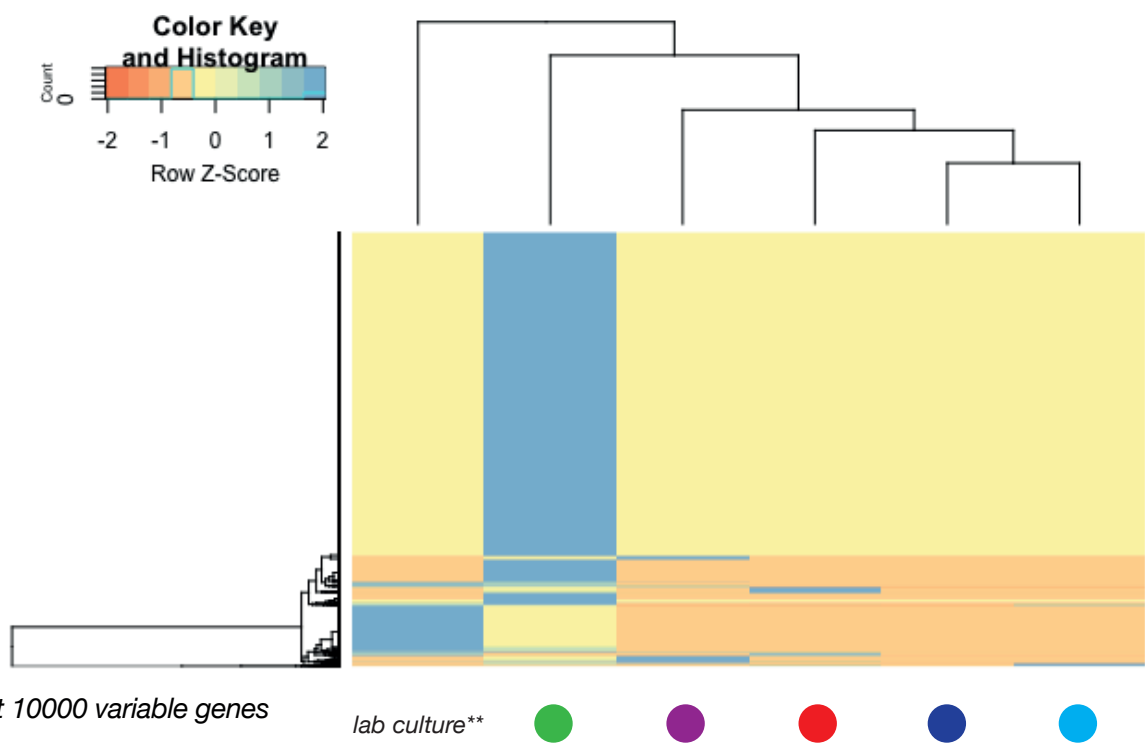

- Mayotte
- Kristineberg
- Oban
- Faro
- Ischia
