# Supplementary material
Source: PubMed Central journal article supplement (PMC11563283)
Supplement: media-16.pdf [file media-16.pdf]

A

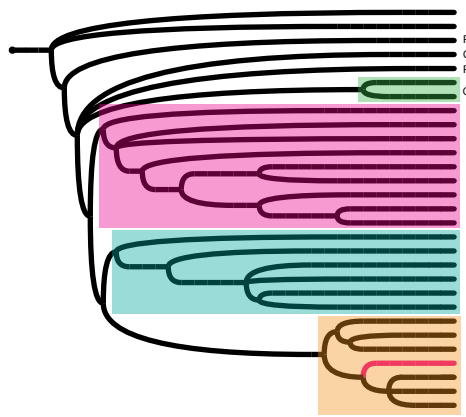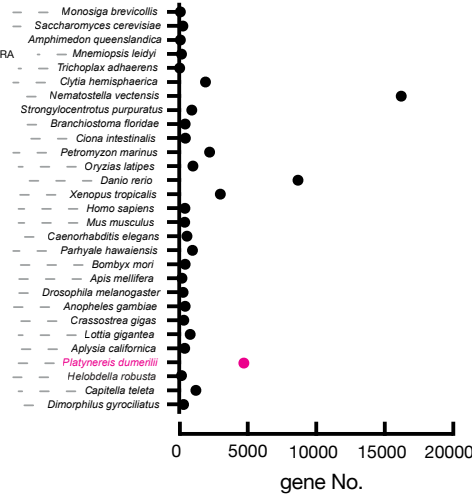

B

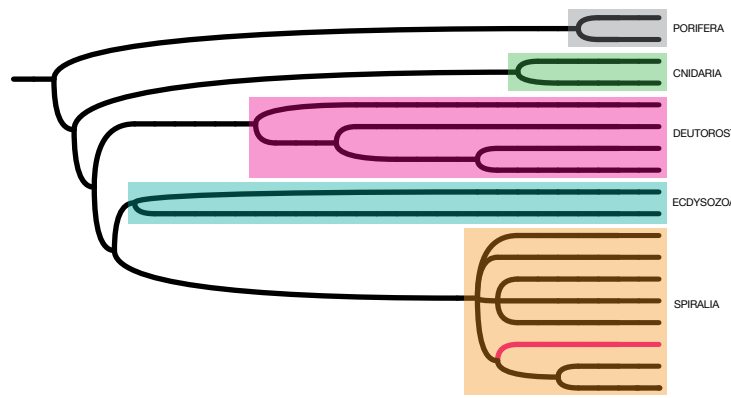

**miRNAs**

|                                | gene No. | gene family No. |
|--------------------------------|----------|-----------------|
| <i>Ephydatia muelleri</i>      | 7        | 5               |
| <i>Amphimedon queenlandica</i> | 8        | 7               |
| <i>Hydra vulgaris</i>          | 26       | 23              |
| <i>Nematostella vectensis</i>  | 30       | 24              |
| <i>Danio rerio</i>             | 414      | 113             |
| <i>Gallus gallus</i>           | 286      | 136             |
| <i>Mus musculus</i>            | 452      | 224             |
| <i>Homo sapiens</i>            | 567      | 268             |
| <i>Caenorhabditis elegans</i>  | 145      | 89              |
| <i>Drosophila melanogaster</i> | 159      | 99              |
| <i>Lingula anatina</i>         | 106      | 51              |
| <i>Schmidtea mediterranea</i>  | 107      | 45              |
| <i>Crassostrea gigas</i>       | 137      | 60              |
| <i>Lottia gigantea</i>         | 82       | 54              |
| <i>Octopus vulgaris</i>        | 177      | 135             |
| <i>Platynereis dumerilii</i>   | 109(+)   | 56(+)           |
| <i>Capitella teleta</i>        | 102      | 69              |
| <i>Eisenia fetida</i>          | 193      | 66              |
