# Supplementary material
Source: PubMed Central journal article supplement (PMC11563283)

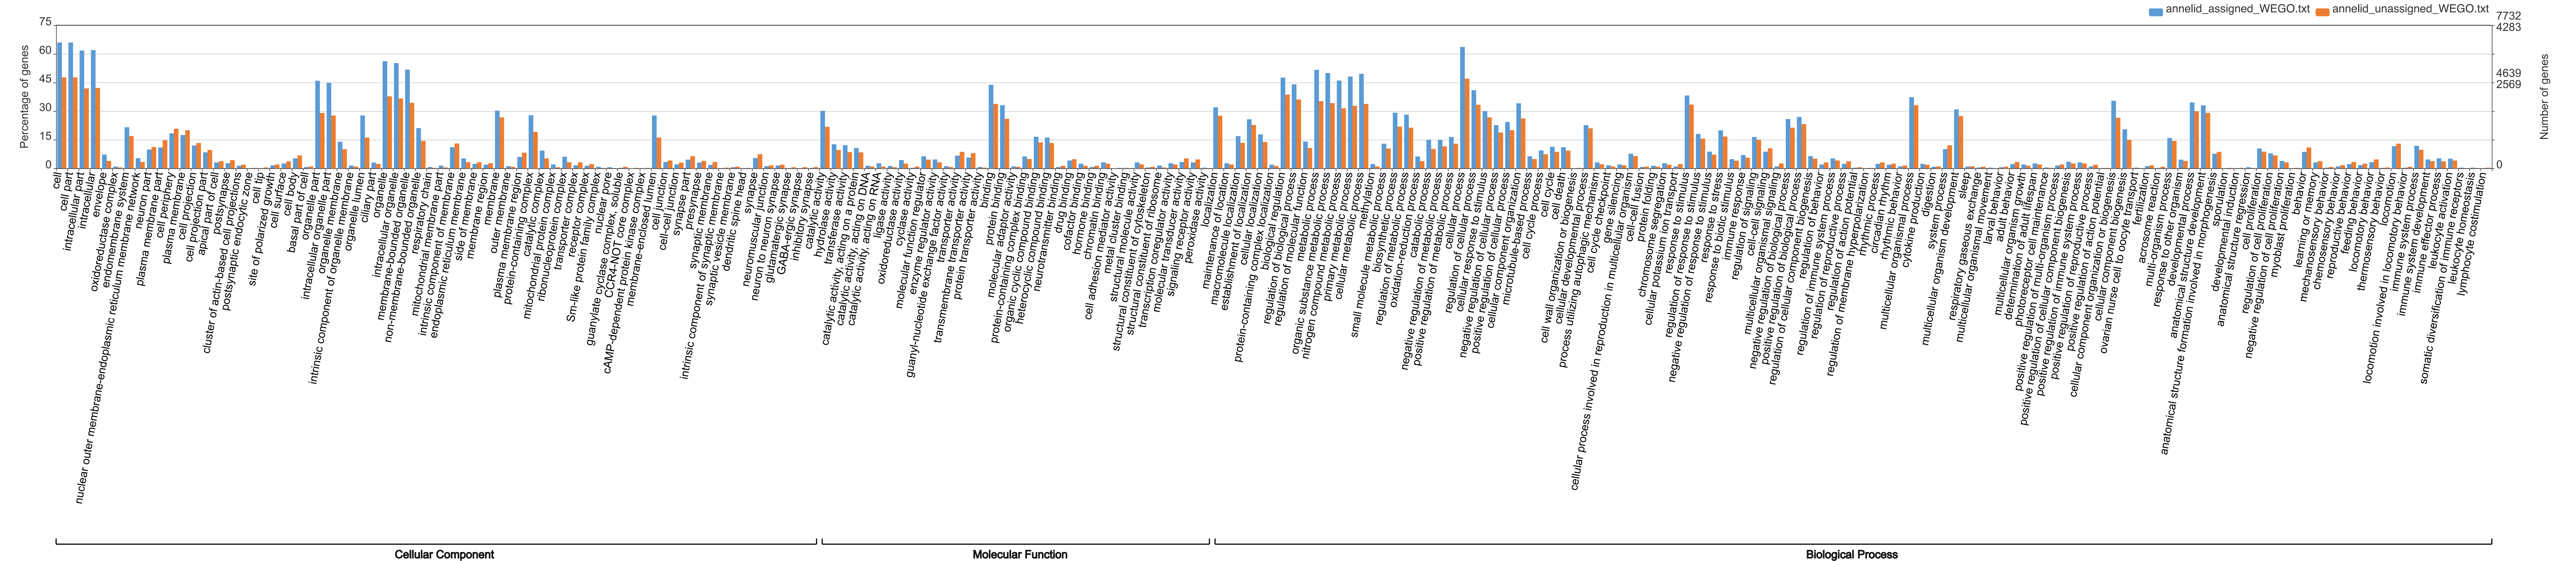

Supplement: media-17.pdf [file media-17.pdf]
