# Supplementary material
Source: PubMed Central journal article supplement (PMC11563283)

**A**

gene length feature size/count correlation

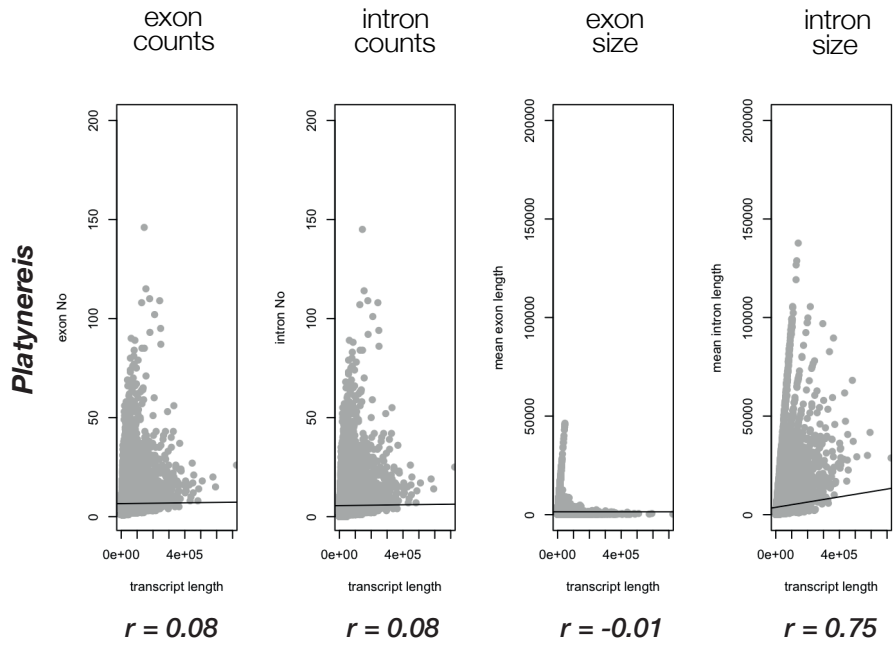

**B**

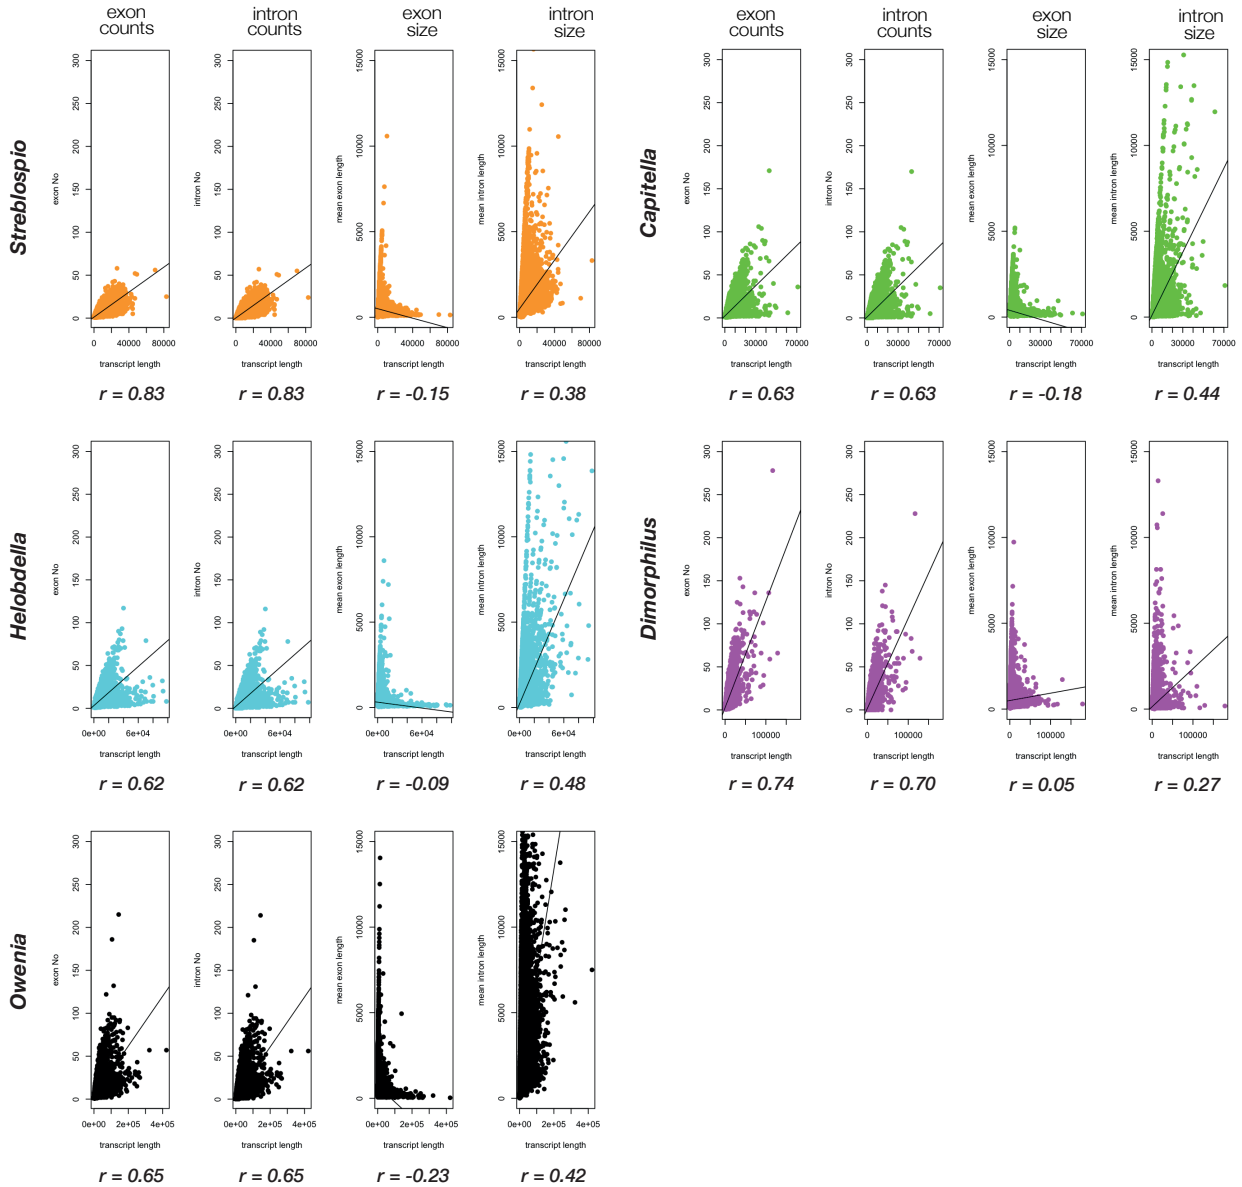

Supplement: media-18.pdf [file media-18.pdf]
