# Supplementary material
Source: PubMed Central journal article supplement (PMC11563283)

# gene feature sizes in annelids

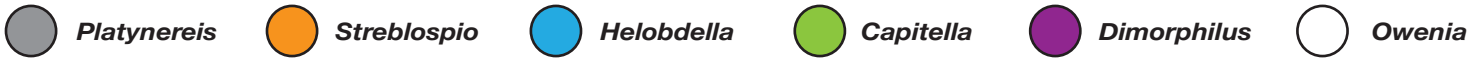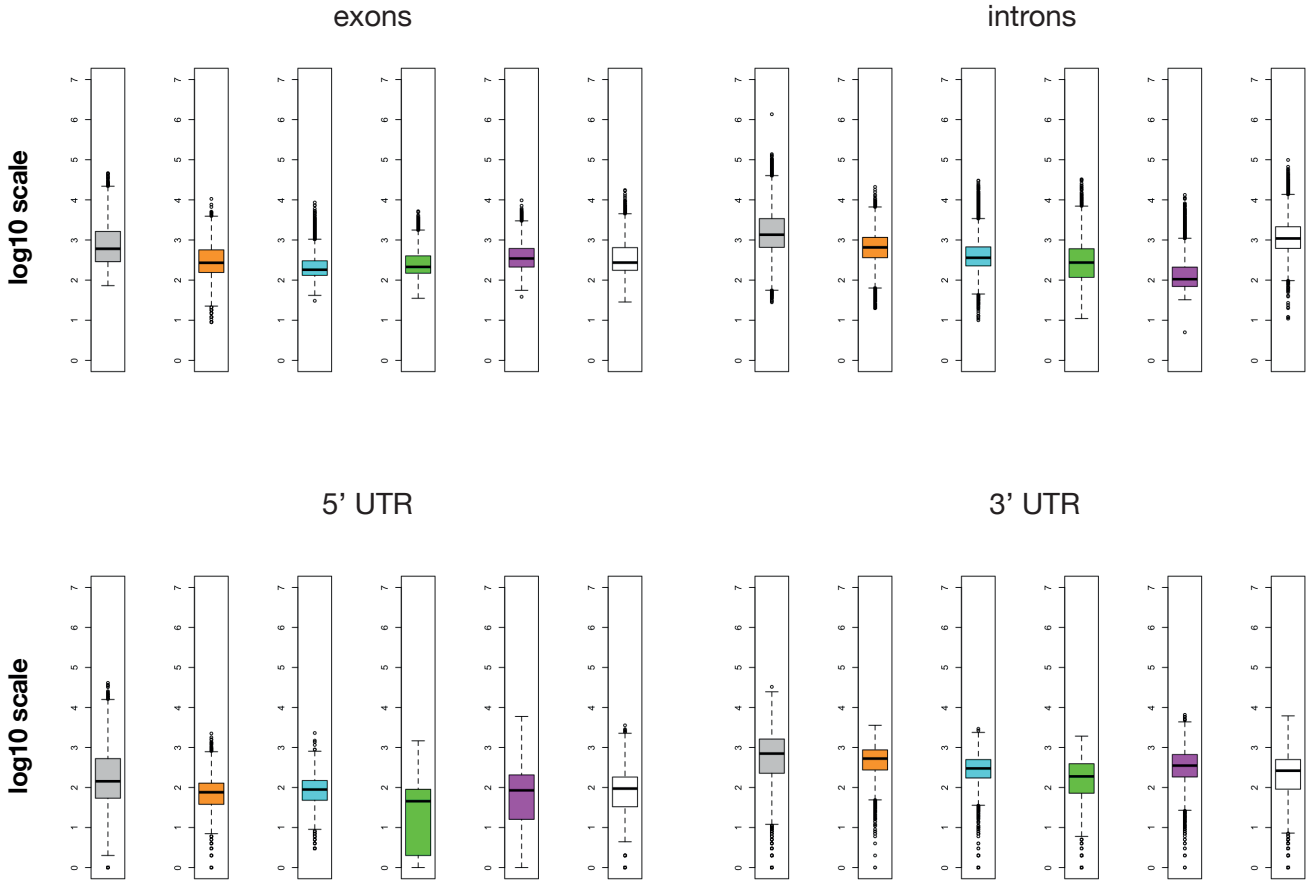

Supplement: media-19.pdf [file media-19.pdf]
